# Supplementary material for: Evaluation and Structuring of Agrodiversity in Oases Agroecosystems of Southern Morocco
Source: MDPI journal article supplement (doi:10.3390/agriculture13071413), 2023-07-17
Supplement: s1 [file s1]

## Article

# Evaluation and Structuring of Agrodiversity in Oases Agroecosystems of Southern Morocco

Mhammad Houssni <sup>1</sup>, Jalal Kassout <sup>2</sup>, Mohamed El Mahroussi <sup>1</sup>, Soufian Chakkour <sup>1</sup>, Mohamed Kadiri <sup>1</sup>, Mohammed Ater <sup>1</sup> and Alexandru-Ionut Petrisor <sup>3,4,5,6,\*</sup>

<sup>1</sup> Bio-Agrodiversity Team, Laboratory of Applied Botany, Faculty of Sciences, University of Abdelmalek Essaâdi, BP 2121, Tétouan 93030, Morocco; mhammadhoussni@gmail.com (M.H.); elmahroussi.mohamed@gmail.com (M.E.M.); chakkoursoufian@gmail.com (S.C.); mohamedkadiri@gmail.com (M.K.); mohammed.ater@gmail.com (M.A.)

<sup>2</sup> Regional Agricultural Research Center of Marrakech, National Institute of Agricultural Research, Avenue Ennasr, P.O. Box 415, Rabat 10090, Morocco; jalal.kassout@inra.ma (J.K.)

<sup>3</sup> Doctoral School of Urban Planning, Ion Mincu University of Architecture and Urbanism, 10014 Bucharest, Romania

<sup>4</sup> Department of Architecture, Faculty of Architecture and Urban Planning, Technical University of Moldova, 2004 Chisinau, Moldova

<sup>5</sup> National Institute for Research and Development in Constructions, Urbanism and Sustainable Spatial Development URBAN-INCERC, 21652 Bucharest, Romania

<sup>6</sup> National Institute for Research and Development in Tourism, 50741 Bucharest, Romania

\* Correspondence: alexandru\_petrisor@yahoo.com; Tel.: +40-213-077-191

## Supplementary Material

**Table S1.** Crops and varieties recorded in the oases studied.

| Crop (%)            | Variety              | Code | Alnif | Zagora | Aoufous | Rich | Guelmim | Tata |
|---------------------|----------------------|------|-------|--------|---------|------|---------|------|
| Cereals             |                      |      |       |        |         |      |         |      |
| Soft wheat (22,67)  | <i>Not specified</i> | V1   | +     | +      | -       | -    | -       | +    |
|                     | <i>Achtar</i>        | V4   | +     | +      | -       | -    | -       | +    |
|                     | <i>Nesma</i>         | V9   | +     | +      | -       | -    | -       | -    |
|                     | <i>Azouga</i>        | V14  | -     | -      | -       | -    | +       | -    |
|                     | <i>Tagoraret</i>     | V15  | -     | -      | -       | -    | -       | +    |
| Durum wheat (36,83) | <i>Aghzzaf</i>       | V2   | -     | -      | -       | +    | -       | -    |
|                     | <i>Aberyouun</i>     | V3   | +     | -      | -       | -    | -       | -    |
|                     | <i>Aksad</i>         | V5   | +     | -      | -       | -    | -       | -    |
|                     | <i>Karim</i>         | V6   | +     | -      | -       | -    | -       | +    |
|                     | <i>Korite</i>        | V7   | +     | -      | +       | -    | -       | -    |
|                     | <i>Merzouka</i>      | V8   | +     | -      | -       | -    | -       | -    |
|                     | <i>Zarban</i>        | V10  | +     | -      | -       | +    | -       | -    |
|                     | <i>Tafilalet</i>     | V11  | -     | -      | -       | -    | -       | +    |
|                     | <i>Tizekerte</i>     | V12  | -     | -      | -       | -    | -       | +    |
|                     | <i>Ouchen</i>        | V13  | -     | -      | -       | -    | +       | +    |
| Barley (55,33)      | <i>Beldi</i>         | V16  | +     | +      | +       | +    | +       | +    |
|                     | <i>Algouz</i>        | V17  | -     | -      | -       | -    | +       | +    |
|                     | <i>Azermz</i>        | V18  | -     | -      | -       | -    | -       | +    |
|                     | <i>Bour</i>          | V19  | -     | -      | -       | -    | -       | +    |

| Crop (%)          | Variety              | Code | Alnif | Zagora | Aoufous | Rich | Guelmim | Tata |
|-------------------|----------------------|------|-------|--------|---------|------|---------|------|
|                   | <i>Amazigh</i>       | V20  | -     | -      | -       | -    | -       | +    |
|                   | <i>Lalten</i>        | V21  | -     | -      | -       | -    | -       | +    |
|                   | <i>Mderma</i>        | V22  | -     | -      | -       | -    | +       | -    |
|                   | <i>Not specified</i> | V23  | -     | -      | -       | -    | +       | -    |
| Corn<br>(54,5)    | <i>Byed</i>          | V24  | +     | +      | +       | +    | +       | +    |
|                   | <i>Hmar</i>          | V25  | +     | -      | +       | +    | +       | +    |
|                   | <i>Araïchi</i>       | V26  | +     | -      | -       | -    | -       | -    |
|                   | <i>Rich</i>          | V27  | +     | -      | -       | -    | -       | -    |
| Sorghum (5,83)    | -                    | V28  | -     | -      | -       | -    | +       | +    |
| Millet (1)        | -                    | V29  | -     | -      | -       | -    | -       | +    |
| Pulses            |                      |      |       |        |         |      |         |      |
| Fava Bean (54,83) | <i>Beyda</i>         | V30  | +     | +      | +       | +    | +       | +    |
|                   | <i>Ouarzazate</i>    | V31  | -     | -      | -       | -    | -       | +    |
|                   | <i>Kehla</i>         | V32  | +     | -      | +       | -    | +       | +    |
| Lens (5,67)       | -                    | V33  | +     | +      | -       | -    | -       | +    |
| Pea (12,5)        | <i>Beldia</i>        | V34  | +     | +      | +       | -    | +       | +    |
|                   | <i>Romia</i>         | V35  | +     | -      | -       | -    | -       | -    |
| Chickpea (1,67)   | -                    | V36  | +     | -      | -       | -    | -       | +    |
| Bean (1,17)       | -                    | V37  | -     | -      | -       | +    | +       | +    |
| Vegetables        |                      |      |       |        |         |      |         |      |
| Potato (10,33)    | <i>Beyda</i>         | V38  | +     | +      | -       | +    | -       | -    |
|                   | <i>Hamra</i>         | V39  | +     | -      | -       | +    | +       | +    |
| Onion (38,17)     | <i>Roumi</i>         | V40  | -     | -      | -       | -    | -       | +    |
|                   | <i>Beldi</i>         | V41  | +     | +      | +       | +    | +       | +    |
| Carrot (42,33)    | <i>Sfar</i>          | V42  | -     | -      | -       | -    | +       | +    |
|                   | <i>Hmar</i>          | V43  | +     | +      | +       | +    | +       | +    |
| Tomato (12,83)    | -                    | V44  | +     | +      | +       | +    | +       | +    |
| Okra (19)         | <i>Hamra</i>         | V45  | -     | +      | +       | -    | -       | -    |
|                   | <i>Mchawka</i>       | V46  | -     | +      | -       | -    | -       | -    |
|                   | <i>Ratba</i>         | V47  | +     | +      | +       | -    | -       | -    |
| Turnip (45)       | <i>Elfajli</i>       | V48  | -     | -      | -       | -    | +       | +    |
|                   | <i>Tagherdayte</i>   | V49  | -     | -      | -       | -    | +       | +    |
|                   | <i>Mahfour</i>       | V50  | -     | -      | -       | -    | -       | +    |
|                   | <i>Romi</i>          | V51  | +     | +      | +       | +    | +       | +    |
| Pepper (4,33)     | -                    | V52  | +     | +      | -       | +    | -       | -    |
| Zucchini (17,33)  | -                    | V54  | +     | +      | +       | +    | +       | +    |
| Gourd (16,83)     | <i>Mkerkba</i>       | V55  | +     | +      | +       | +    | +       | +    |
|                   | <i>Slaoui</i>        | V56  | +     | +      | +       | -    | -       | -    |
| Beet (9,83)       | -                    | V57  | +     | +      | -       | -    | +       | +    |
| Eggplant (20,67)  | -                    | V58  | +     | +      | +       | +    | +       | +    |

| Crop (%)             | Variety               | Code | Alnif | Zagora | Aoufous | Rich | Guelmim | Tata |
|----------------------|-----------------------|------|-------|--------|---------|------|---------|------|
| Lettuce (2,33)       | -                     | V59  | +     | -      | +       | -    | -       | -    |
| Cucumber (1,67)      | -                     | V60  | +     | -      | +       | -    | -       | -    |
| Garlic (1,33)        | -                     | V62  | +     | +      | -       | -    | -       | -    |
| Cabbage (10,5)       | -                     | V63  | +     | +      | +       | +    | +       | +    |
| Watermelon (2.33)    | -                     | V67  | +     | -      | -       | -    | -       | -    |
| Melon (2,17)         | -                     | V68  | +     | -      | -       | -    | -       | -    |
| Parsley (19,5)       | -                     | V69  | -     | +      | +       | +    | +       | +    |
| Coriander (3,67)     | -                     | V70  | -     | -      | -       | -    | +       | +    |
| Mint (14,33)         | -                     | V71  | -     | -      | +       | +    | +       | +    |
| Seeds - Spices       |                       |      |       |        |         |      |         |      |
| Chili pepper (15,17) | -                     | V53  | +     | -      | +       | +    | +       | +    |
| Cumin (0,17)         | -                     | V61  | +     | -      | -       | -    | -       | -    |
| Peanut (0,17)        | -                     | V64  | +     | -      | -       | -    | -       | -    |
| Fenugreek (0,17)     | -                     | V65  | -     | -      | -       | -    | -       | +    |
| Sesame (0,33)        | -                     | V66  | +     | -      | -       | -    | -       | -    |
| Forages              |                       |      |       |        |         |      |         |      |
| Alfalfa (92,33)      | <i>Beldia</i>         | V72  | +     | +      | +       | +    | +       | +    |
|                      | <i>Australia</i>      | V73  | +     | +      | +       | +    | +       | +    |
|                      | <i>Saoudia</i>        | V74  | +     | -      | -       | -    | -       | -    |
|                      | <i>Canada</i>         | V75  | -     | -      | -       | -    | +       | +    |
|                      | <i>Demnate</i>        | V76  | -     | -      | -       | -    | +       | -    |
|                      | <i>Moapa</i>          | V77  | -     | -      | -       | -    | -       | +    |
|                      | <i>American</i>       | V78  | +     | -      | -       | -    | +       | +    |
| Forage Sorghum (10)  | -                     | V79  | +     | -      | +       | -    | +       | +    |
| Fruit trees          |                       |      |       |        |         |      |         |      |
| Fig tree (42)        | <i>Byed</i>           | V80  | +     | +      | +       | +    | +       | +    |
|                      | <i>Abachil</i>        | V81  | -     | -      | -       | -    | +       | -    |
|                      | <i>Tamalka</i>        | V82  | -     | -      | -       | -    | +       | -    |
|                      | <i>Bakour</i>         | V83  | -     | -      | -       | -    | +       | +    |
|                      | <i>Lghdania</i>       | V84  | -     | -      | -       | -    | +       | +    |
|                      | <i>Tagordante</i>     | V85  | -     | -      | -       | -    | +       | -    |
|                      | <i>Tafounaste</i>     | V86  | -     | -      | -       | -    | -       | +    |
|                      | <i>Iâisa</i>          | V87  | -     | -      | -       | -    | +       | -    |
|                      | <i>Espagnole</i>      | V88  | -     | -      | -       | -    | +       | -    |
|                      | <i>Bzoulte Lâawda</i> | V89  | -     | -      | -       | -    | +       | +    |
|                      | <i>Kahla</i>          | V90  | -     | -      | -       | -    | +       | +    |
|                      | <i>Hmar</i>           | V91  | +     | +      | +       | +    | -       | -    |
|                      | <i>Khder</i>          | V92  | +     | +      | +       | -    | -       | -    |
|                      | <i>Ain lhejla</i>     | V93  | +     | -      | +       | +    | -       | -    |
|                      | <i>Lfokaâ</i>         | V94  | +     | -      | -       | -    | -       | -    |

| Crop (%)              | Variety            | Code | Alnif | Zagora | Aoufous | Rich | Guelmim | Tata |
|-----------------------|--------------------|------|-------|--------|---------|------|---------|------|
| Pomegranate tree (36) | <i>Targuiyte</i>   | V95  | +     | -      | -       | -    | -       | -    |
|                       | <i>Beldi</i>       | V96  | +     | +      | -       | +    | +       | +    |
|                       | <i>Al âansri</i>   | V97  | -     | -      | +       | -    | -       | -    |
|                       | <i>Khrifi</i>      | V98  | -     | -      | +       | -    | -       | -    |
|                       | <i>Al-Hamed</i>    | V99  | -     | -      | +       | -    | +       | +    |
|                       | <i>Roudani</i>     | V100 | -     | -      | -       | -    | +       | -    |
|                       | <i>Elâadmi</i>     | V101 | -     | -      | -       | -    | +       | -    |
|                       | <i>Sefri</i>       | V102 | -     | -      | -       | -    | +       | +    |
| Apricot (13)          | <i>Lozmechmach</i> | V103 | -     | -      | -       | -    | +       | -    |
|                       | <i>Romi</i>        | V104 | -     | -      | -       | -    | +       | +    |
|                       | <i>Beldi</i>       | V105 | +     | +      | +       | +    | +       | +    |
| Grapevine (16,33)     | <i>Bida</i>        | V106 | -     | -      | -       | -    | +       | +    |
|                       | <i>Kehla</i>       | V107 | -     | -      | -       | -    | +       | +    |
|                       | <i>Bzollâawd</i>   | V108 | -     | -      | -       | -    | -       | +    |
|                       | <i>Moska</i>       | V109 | -     | -      | -       | -    | -       | +    |
|                       | <i>Non précis</i>  | V110 | +     | +      | +       | -    | -       | -    |
| Orange tree (16,33)   | <i>Zenboh</i>      | V111 | -     | -      | -       | -    | +       | +    |
|                       | <i>Nafile</i>      | V112 | +     | +      | +       | -    | +       | +    |
| Mandarin tree (2,5)   | -                  | V113 | -     | -      | -       | -    | +       | +    |
| Almond tree (14,83)   | <i>Elhare</i>      | V114 | -     | -      | -       | -    | +       | +    |
|                       | <i>Lhlo</i>        | V115 | +     | +      | +       | +    | +       | +    |
| Apple tree(13)        | <i>Beldi</i>       | V116 | +     | -      | +       | +    | +       | +    |
|                       | <i>Romi</i>        | V117 | -     | -      | -       | +    | -       | -    |
|                       | <i>Stark</i>       | V118 | -     | -      | -       | +    | -       | -    |
|                       | <i>Golden</i>      | V119 | -     | -      | -       | +    | -       | -    |
|                       | <i>Mchrat</i>      | V120 | -     | -      | -       | +    | -       | -    |
|                       | <i>Lgala</i>       | V121 | -     | -      | -       | +    | -       | -    |
| Olive tree (48,33)    | <i>Beldi</i>       | V122 | +     | -      | +       | +    | +       | +    |
|                       | <i>Dahbia</i>      | V123 | -     | -      | -       | -    | +       | -    |
|                       | <i>Meknasia</i>    | V124 | -     | -      | -       | -    | +       | -    |
|                       | <i>Haouzia</i>     | V125 | -     | -      | -       | -    | +       | -    |
| Quince tree (14,17)   | -                  | V126 | +     | -      | +       | +    | +       | +    |
| Peach tree (6,67)     | -                  | V127 | -     | -      | +       | +    | +       | -    |
| Walnut (3,83)         | -                  | V128 | -     | -      | -       | +    | -       | -    |
| Prickly pear (1)      | -                  | V129 | -     | -      | -       | +    | -       | -    |
| Carob tree (3,17)     | -                  | V130 | -     | -      | -       | -    | +       | +    |
| Pear tree (1,17)      | -                  | V131 | -     | -      | -       | -    | +       | +    |
| Lemon tree (5,67)     | <i>Beldi</i>       | V132 | -     | -      | -       | -    | +       | +    |
|                       | <i>Roumi</i>       | V133 | -     | -      | -       | -    | -       | +    |
| Date palm (73,33)     | <i>Mejhoul</i>     | V134 | +     | +      | +       | -    | -       | +    |

| Crop (%) | Variety                          | Code | Alnif | Zagora | Aoufous | Rich | Guelmim | Tata |
|----------|----------------------------------|------|-------|--------|---------|------|---------|------|
|          | <i>Boufegouss</i>                | V135 | +     | +      | +       | -    | +       | +    |
|          | <i>Tahmoute</i>                  | V136 | +     | +      | +       | -    | -       | +    |
|          | <i>Sayer(Khelt)</i>              | V137 | +     | +      | +       | -    | +       | +    |
|          | <i>Azizaw</i>                    | V138 | +     | -      | -       | -    | -       | -    |
|          | <i>Toungalte</i>                 | V139 | +     | -      | -       | -    | -       | -    |
|          | <i>Bouslikhene</i>               | V140 | +     | -      | +       | -    | -       | -    |
|          | <i>Tazggaghte</i>                | V141 | +     | +      | -       | -    | -       | -    |
|          | <i>Lferch</i>                    | V142 | +     | -      | -       | -    | +       | -    |
|          | <i>Jihl</i>                      | V143 | -     | +      | -       | -    | +       | +    |
|          | <i>Klane</i>                     | V144 | -     | +      | -       | -    | -       | +    |
|          | <i>Aglide</i>                    | V145 | -     | +      | -       | -    | -       | -    |
|          | <i>Bourar</i>                    | V146 | -     | +      | -       | -    | -       | +    |
|          | <i>Ahardane</i>                  | V147 | -     | +      | -       | -    | -       | -    |
|          | <i>Bousakri</i>                  | V148 | -     | +      | -       | -    | +       | +    |
|          | <i>Chatoui</i>                   | V149 | -     | +      | -       | -    | -       | -    |
|          | <i>Jaâferi</i>                   | V150 | -     | +      | -       | -    | -       | -    |
|          | <i>M'ket</i>                     | V151 | -     | +      | -       | -    | -       | +    |
|          | <i>Mallal</i>                    | V152 | -     | +      | -       | -    | -       | -    |
|          | <i>Akadousse</i>                 | V153 | -     | -      | +       | -    | -       | -    |
|          | <i>Bid Djaje</i>                 | V154 | -     | -      | +       | -    | -       | -    |
|          | <i>Rass Latmer (Rass la7mar)</i> | V155 | -     | -      | +       | -    | -       | -    |
|          | <i>Initfite</i>                  | V156 | -     | -      | +       | -    | -       | -    |
|          | <i>Bousserdoune (Tarzawa)</i>    | V157 | -     | -      | +       | -    | -       | -    |
|          | <i>Maâjounne</i>                 | V158 | -     | -      | +       | -    | -       | -    |
|          | <i>Kerna</i>                     | V159 | -     | -      | +       | -    | -       | -    |
|          | <i>Kerchaou</i>                  | V160 | -     | -      | +       | -    | -       | -    |
|          | <i>Admou</i>                     | V161 | -     | -      | +       | -    | -       | -    |
|          | <i>Bellahzid</i>                 | V162 | -     | -      | +       | -    | -       | -    |
|          | <i>Ouhefssa</i>                  | V163 | -     | -      | +       | -    | -       | -    |
|          | <i>Ouâamrane</i>                 | V164 | -     | -      | +       | -    | -       | -    |
|          | <i>Bouwtoubne</i>                | V165 | -     | -      | -       | -    | +       | +    |
|          | <i>Ist-Taghjijte</i>             | V166 | -     | -      | -       | -    | +       | -    |
|          | <i>Tamoucha</i>                  | V167 | -     | -      | -       | -    | +       | +    |
|          | <i>Admam</i>                     | V168 | -     | -      | -       | -    | +       | +    |
|          | <i>Bouteffah</i>                 | V169 | -     | -      | -       | -    | +       | +    |
|          | <i>Taghanimte</i>                | V170 | -     | -      | -       | -    | +       | +    |
|          | <i>Tahddadte</i>                 | V171 | -     | -      | -       | -    | +       | +    |
|          | <i>Bousouayer</i>                | V172 | -     | -      | -       | -    | -       | +    |
|          | <i>Najda</i>                     | V173 | -     | -      | -       | -    | -       | +    |
|          | <i>Tabouâtirte</i>               | V174 | -     | -      | -       | -    | -       | +    |

| Crop (%) | Variety            | Code | Alnif | Zagora | Aoufous | Rich | Guelmim | Tata |
|----------|--------------------|------|-------|--------|---------|------|---------|------|
|          | <i>Amennan</i>     | V175 | -     | -      | -       | -    | -       | +    |
|          | <i>Tiskerte</i>    | V176 | -     | -      | -       | -    | -       | +    |
|          | <i>Boulkissane</i> | V177 | -     | -      | -       | -    | -       | +    |
|          | <i>M-Teglay</i>    | V178 | -     | -      | -       | -    | -       | +    |
|          | <i>Saoudi</i>      | V179 | -     | -      | -       | -    | -       | +    |
|          | <i>Boudi</i>       | V180 | -     | -      | -       | -    | -       | +    |
|          | <i>Tighlo</i>      | V181 | -     | -      | -       | -    | -       | +    |
|          | <i>Bimon</i>       | V182 | -     | -      | -       | -    | -       | +    |
|          | <i>Boutouala</i>   | V183 | -     | -      | -       | -    | -       | +    |

**Table S2.** Farm structure (M: private; C: collective; H: Habous; A: Other).

| Oasis    | Ksar (village)     | Area (ha)        | Number of plots | Area/plot (ha)    | Ownership type (%) |
|----------|--------------------|------------------|-----------------|-------------------|--------------------|
| Alnif    | Ammar              | 1,8 (0,5-4)      | 3 (2-4)         | 0,66 (0,25-1,5)   | 100 M              |
|          | Tizi               | 0,7 (0,1-3)      | 3 (2-4)         | 0,5 (0,05-1)      | 100 M              |
|          | Alnif              | 2,1 (0,02-10)    | 3 (1-4)         | 1,4 (0,33-4)      | 100 M              |
|          | Achbarou           | 1,6 (0,015-3,5)  | 3 (1-5)         | 0,5 (0,004-1)     | 100 M              |
|          | Ait Zeggane        | 2,2 (0,25-7)     | 3 (2-4)         | 0,7 (0,08-1,75)   | 100 M              |
|          | Total              | 1,68 (0,18- 5,5) | 3(1,6- 4,2)     | 0,75 (0,15- 1,85) | 100 M              |
| Zagora   | Asrir N ilemchane  | 1,1 (0,02-2,5)   | 3 (1-4)         | 0,4 (0,02-2)      | 95 M + 5H          |
|          | Tansita            | 1,4 (0,15-3,5)   | 3 (1-4)         | 0,5 (0,15-1)      | 95 M + 5H          |
|          | Amazrou            | 1,3 (0,1-6)      | 3 (1-4)         | 0,62 (0,16-3)     | 95 M + 5H          |
|          | Sart               | 1,63 (0,1-3)     | 3 (1-4)         | 0,7 (0,1-1,5)     | 100 M              |
|          | Aghla Oudrar       | 1,5 (0,2-4)      | 3 (2-4)         | 0,5 (0,16-1,3)    | 100 M              |
|          | Total              | 1,4 (0,12- 3,8)  | 3 (1,2 - 4)     | 0,54 (0,12 - 1,8) | 97 M + 3H          |
| Aoufouss | Takhyamte          | 1,5 (0,25-3)     | 3 (2-4)         | 0,46 (0,06-1)     | 65 M + 35 C        |
|          | Rbite              | 1,7 (1-4)        | 3 (2-4)         | 0,5 (0,25-1)      | 70 M + 30 C        |
|          | Zrigate            | 1,4 (0,5-4)      | 3 (2-4)         | 0,4 (0,15-0,9)    | 65 M + 35 C        |
|          | Lamâarka           | 1,2 (0,5-2)      | 3 (2-4)         | 0,32 (0,1-0,5)    | 70 M + 30 C        |
|          | Zaouia Jdida       | 1,12 (0,5-2,5)   | 3 (1-4)         | 0,42 (0,16-0,9)   | 65 M + 35 C        |
|          | Total              | 1,4 (0,55 - 3,1) | 3 (1,8- 4)      | 0,42 (0,15- 0,9)  | 67 M + 33 C        |
| Rich     | Ait Moussa Ouali   | 1,3 (0,5-3)      | 3 (2-4)         | 0,49 (0,16-1)     | 65 M + 35 C        |
|          | Zaouia Sidi Boukil | 2,35 (1-4)       | 3 (2-4)         | 0,64 (0,33-1,3)   | 80 M + 20 C        |
|          | Balite             | 1,33 (0,5-2,5)   | 3 (2-4)         | 0,43 (0,16-0,83)  | 75 M + 25 C        |
|          | M'zizel            | 1,9 (1-4,5)      | 3 (2-4)         | 0,6 (0,5-1,125)   | 65 M + 35 C        |
|          | Tamagourte         | 1,6 (0,1-3)      | 3 (2-4)         | 0,53 (0,03-1)     | 75 M + 25C         |
|          | Total              | 1,7 (0,62 - 3,4) | 3 (2 - 4)       | 0,54 (0,24 - 1,1) | 72 M + 28 C        |
| Guelmim  | Tighmert           | 0,36 (0,1-0,8)   | 9,81 (4-16)     | 0,03 (0,02-0,06)  | 85 M               |
|          | Ifrane             | 0,64 (0,05-3,5)  | 10,58 (3-40)    | 0,04 (0,01-0,1)   | 89 M + 11 A        |

| Oasis | Ksar (village) | Area (ha)       | Number of plots | Area/plot (ha)    | Ownership type (%) |
|-------|----------------|-----------------|-----------------|-------------------|--------------------|
|       | Fask           | 1 (0,05-6)      | 1,8 (1-5)       | 0,58 (0,05-5)     | 100 M              |
|       | Tagante        | 0,46 (0,05-2,5) | 5,32 (1-15)     | 0,2 (0,01-2)      | 100 M              |
|       | Taghjijt       | 0,18 (0,04-0,5) | 5,11 (3-11)     | 0,03 (0,01-0,15)  | 90 M               |
|       | Total          | 0,52 (0,04-6)   | 6,52 (1-40)     | 0,17 (0,01-5)     | 92,8 M + 2,2A      |
|       | Tissint        | 0,2 (0,1-0,6)   | 6,85 (3-17)     | 0,035 (0,015-0,1) | 95 M + 10 A        |
| Tata  | Akka           | 0,22 (0,1-0,5)  | 8,2 (2-20)      | 0,033 (0,02-0,1)  | 90 M               |
|       | Ait Oubelli    | 0,28 (0,06-1,5) | 5,6 (1-13)      | 0,05 (0,02-0,4)   | 85 M               |
|       | Foum Zguid     | 0,26 (0,1-0,7)  | 6,7 (2-15)      | 0,04 (0,01-0,075) | 95 M               |
|       | Foum Lahcen    | 0,35 (0,1-1,5)  | 9,1 (3-25)      | 0,05 (0,02-0,3)   | 95 M               |
|       | Total          | 0,26 (0,06-1,5) | 7,29 (1-25)     | 0,04 (0,01-0,4)   | 92 M + 2 A         |

**Table S3.** Agricultural practices (An: Animal; Tr: Tractor; Ch: Plough; Ti: Three-wheeler; Ca: Truck; T: Traditional; Me: Mechanical; K: Khettaras; S: Seguia; Pg: Diesel pump; Pz: Gas pump).

| Oasis    | Ksar (village)     | Transport by %       | Ploughing in % | Threshing in % | Irrigation in % |
|----------|--------------------|----------------------|----------------|----------------|-----------------|
| Alnif    | Ammar              | 100An + 100Tr        | 100Me          | 100Me          | 100K + 100Pg    |
|          | Tizi               | 100An + 70 Tr        | 100Me          | 100Me          | 100K + 100Pg    |
|          | Alnif              | 30An + 35Ch + 100 Tr | 100Me          | 100Me          | 100K + 100Pg    |
|          | Achbarou           | 45An + 10Ch + 90Tr   | 100Me          | 100Me          | 20K + 95Pg      |
|          | Ait Zeggane        | 100Tr                | 100Me          | 100Me          | 100Pg           |
|          | Total              | 55An + 9Ch + 92Tr    | 100Me          | 100Me          | 64K + 99Pg      |
| Zagora   | Asrir N ilemchane  | 78An + 17Ch + 45Tr   | 26T + 74Me     | 21T + 79Me     | 85Pg + 15Pz     |
|          | Tansita            | 61An + 78Ch + 11Tr   | 15T + 85Me     | 10T + 90Me     | 100Pg           |
|          | Amazrou            | 70An + 85Ch + 5Tr    | 25T + 75Me     | 25T + 75Me     | 100Pg           |
|          | Sart               | 60An + 70Ch + 10Tr   | 25T + 75Me     | 25T + 75Me     | 100Pg           |
|          | Aghla Oudrar       | 70An + 60Ch + 10Tr   | 15T + 85Me     | 15T + 85Me     | 100Pg           |
|          | Total              | 68An + 62Ch + 16,2Tr | 21,2T + 79Me   | 19,2T + 81Me   | 97Pg + 3Pz      |
| Aoufouss | Takhymte           | 100An + 10Tr         | 35T + 65Me     | 70T + 30Me     | 100S + 85Pg     |
|          | Rbite              | 100An + 15Tr         | 65T + 35Me     | 80T + 20Me     | 100S + 95Pg     |
|          | Zrigate            | 100An + 5Ti + 5Tr    | 55T + 45Me     | 65T + 35Me     | 100S + 100Pg    |
|          | Lamâarka           | 100An + 5Ti          | 35T + 65Me     | 35T + 65Me     | 100S + 90Pg     |
|          | Zaouia Jdida       | 100An                | 85T + 15Me     | 75T + 25Me     | 100S + 90Pg     |
|          | Total              | 100An + 2Ti + 6Tr    | 55T + 45Me     | 65T + 35Me     | 100S + 92Pg     |
| Rich     | Ait Moussa Ouali   | 100An                | 30T + 70Me     | 30T + 70Me     | 100S + 80Pg     |
|          | Zaouia Sidi Boukil | 100An + 5Tr          | 100Me          | 5T + 95Me      | 100S + 100Pg    |
|          | Balite             | 100An                | 20T + 80Me     | 15T + 85Me     | 100S + 90Pg     |
|          | M'zizel            | 100An                | 5T + 95Me      | 5T + 95Me      | 100S + 90Pg     |
|          | Tamagourte         | 100An + 5Tr          | 10T + 90Me     | 10T + 90Me     | 100S + 30Pg     |
|          | Total              | 100An + 2Tr          | 13T + 87Me     | 13T + 87Me     | 78Pg            |
| Guelmim  | Tighmert           | 85An + 80Ch + 35Ca   | 85T + 70Me     | 85T + 65Me     | 85K             |

| Oasis | Ksar (village) | Transport by %         | Ploughing in % | Threshing in % | Irrigation in % |
|-------|----------------|------------------------|----------------|----------------|-----------------|
|       | Ifrane         | 80An + 5Ch             | 90T            | 95T + 70Me     | 95K + 20Pg      |
|       | Fask           | 87An + 93Ch + 20Ca     | 87T + 93Me     | 93T + 100Me    | 87K + 27Pg      |
|       | Tagante        | 95An + 63Ch + 37Ca     | 74T + 58Me     | 95T + 53Me     | 89K + 37Pg      |
|       | Taghjijt       | 65An + 70Ch + 5Ca      | 80T + 70Me     | 90T+30Me       | 90K + 15Pg      |
|       | Total          | 82,4An+ 62,2Ch+ 19,4Ca | 83,2T + 58,2Me | 91,6T + 63,6Me | 89K + 20Pg      |
| Tata  | Tissint        | 90An + 50Ch + 5Ca      | 100T + 25Me    | 100T + 15Me    | 70K +45Pg       |
|       | Akka           | 80An + 70Ch + 35Ca     | 90T + 60Me     | 90T + 60Me     | 85K + 25Pg      |
|       | Ait Oubelli    | 80An + 60Ch + 15Ca     | 85T + 55Me     | 85T + 65Me     | 45K + 60Pg      |
|       | Foum zguid     | 75An + 85Ch + 15Ca     | 85T + 35Me     | 95T + 45Me     | 55K + 75Pg      |
|       | Foum lahcen    | 65An + 85Ch + 10Ca     | 95T + 60Me     | 1T + 65Me      | 95K             |
|       | Total          | 78An + 70Ch + 16Ca     | 91T + 47Me     | 74,2T + 50Me   | 70k + 41Pg      |

**Table S4.** Coordinates of the different variables studied (farming practices) in axes 1 and 2 of the Principal Component Analysis.

|                                 | Axis 1       | Axis 2       |
|---------------------------------|--------------|--------------|
| <b>% of variation explained</b> | <b>37,9%</b> | <b>25,6%</b> |
| Traditional ploughing           | -0,93        | 0,022        |
| Average area                    | 0,876        | -0,249       |
| Area per plot                   | 0,849        | 0,012        |
| Traditional threshing           | -0,839       | -0,099       |
| Transport by Tractor            | 0,739        | 0,44         |
| Well water irrigation           | 0,737        | -0,215       |
| Average number of plots         | -0,694       | 0,312        |
| Transport by Truck              | -0,689       | 0,28         |
| Mechanical ploughing            | 0,676        | 0,253        |
| Mechanical threshing            | 0,654        | 0,395        |
| collective properties           | 0,146        | -0,972       |
| Irrigation by Seguia            | 0,182        | -0,963       |
| Private property                | 0,067        | 0,954        |
| Transport by Animal             | -0,302       | -0,678       |
| Transport by Plough             | -0,582       | 0,596        |
| Transport by Three-wheeler      | -0,004       | -0,476       |
| Habous property                 | 0,069        | 0,255        |
| Irrigation by Khettara          | -0,361       | 0,575        |

**Table S5.** Coordinates of different varieties identified in planes 1 and 2 of the Factorial Correspondence Analysis.

| Variety   | Axis 1 | Axis 2 | Group | Variety    | Axe 1 | Axe 2  | Group |
|-----------|--------|--------|-------|------------|-------|--------|-------|
| <b>V1</b> | 0,859  | -0,997 | Gp5   | <b>V94</b> | 1,011 | -2,558 | Gp6   |
| <b>V2</b> | -1,116 | 1,427  | Gp1   | <b>V95</b> | 0,345 | -1,503 | Gp6   |
| <b>V3</b> | 0,580  | -1,674 | Gp6   | <b>V96</b> | 0,296 | 0,491  | Gp4   |



| Variety | Axis 1 | Axis 2 | Group | Variety | Axe 1  | Axe 2  | Group |
|---------|--------|--------|-------|---------|--------|--------|-------|
| V4      | 0,806  | -1,017 | Gp5   | V97     | -1,430 | -0,443 | Gp2   |
| V5      | 0,530  | -1,462 | Gp6   | V98     | -1,592 | -0,472 | Gp2   |
| V6      | 0,701  | -1,216 | Gp6   | V99     | 0,498  | 0,792  | Gp4   |
| V7      | -0,503 | -0,913 | Gp2   | V100    | 0,433  | 1,344  | Gp4   |
| V8      | 0,726  | -2,233 | Gp6   | V101    | 0,433  | 1,483  | Gp4   |
| V9      | 0,689  | -1,715 | Gp6   | V102    | 0,491  | 1,294  | Gp4   |
| V10     | -0,145 | -0,407 | Gp3   | V103    | 0,499  | 1,404  | Gp4   |
| V11     | 0,804  | 0,889  | Gp4   | V104    | 0,865  | 1,074  | Gp4   |
| V12     | 0,712  | 0,767  | Gp4   | V105    | -0,202 | 0,585  | Gp3   |
| V13     | 0,865  | 0,805  | Gp4   | V106    | 0,768  | 0,896  | Gp4   |
| V14     | 0,797  | 1,156  | Gp4   | V107    | 0,778  | 0,835  | Gp4   |
| V15     | 1,110  | 0,974  | Gp4   | V108    | 0,951  | 0,605  | Gp4   |
| V16     | 0,126  | -0,177 | Gp3   | V109    | 1,143  | 0,637  | Gp4   |
| V17     | 0,850  | 0,810  | Gp4   | V110    | -1,055 | -0,710 | Gp2   |
| V18     | 0,911  | 0,817  | Gp4   | V111    | 0,819  | 0,856  | Gp4   |
| V19     | 0,729  | 0,775  | Gp4   | V112    | 0,381  | 0,325  | Gp4   |
| V20     | 1,033  | 0,611  | Gp4   | V113    | 0,717  | 0,963  | Gp4   |
| V21     | 0,847  | 0,782  | Gp4   | V114    | 0,550  | 0,792  | Gp4   |
| V22     | 0,219  | 0,871  | Gp4   | V115    | -0,263 | 0,277  | Gp3   |
| V23     | 0,330  | 1,324  | Gp4   | V116    | -0,623 | 0,228  | Gp3   |
| V24     | 0,080  | -0,113 | Gp3   | V117    | -1,265 | 1,405  | Gp1   |
| V25     | -0,359 | 0,710  | Gp3   | V118    | -1,350 | 1,693  | Gp1   |
| V27     | 0,523  | -1,754 | Gp6   | V119    | -1,280 | 1,684  | Gp1   |
| V28     | 0,406  | 0,446  | Gp4   | V120    | -1,416 | 1,971  | Gp1   |
| V29     | 1,048  | 0,854  | Gp4   | V121    | -0,961 | 1,467  | Gp1   |
| V30     | 0,150  | 0,069  | Gp3   | V122    | -0,474 | 0,487  | Gp3   |
| V31     | 1,143  | 0,666  | Gp4   | V123    | 0,416  | 1,008  | Gp4   |
| V32     | -0,334 | 0,189  | Gp3   | V124    | -0,217 | 0,456  | Gp3   |
| V33     | 0,734  | -0,462 | Gp5   | V125    | 0,063  | 0,311  | Gp3   |
| V34     | 0,303  | -0,501 | Gp3   | V126    | -0,786 | 0,571  | Gp3   |
| V35     | 0,345  | -1,225 | Gp6   | V127    | -1,095 | 1,011  | Gp1   |
| V36     | 0,705  | -0,706 | Gp5   | V128    | -1,108 | 1,402  | Gp1   |
| V37     | 0,618  | 0,882  | Gp4   | V129    | -1,645 | 1,971  | Gp1   |
| V38     | 0,485  | -1,388 | Gp6   | V130    | 0,762  | 1,005  | Gp4   |
| V39     | -0,063 | 0,273  | Gp3   | V131    | 0,739  | 0,875  | Gp4   |
| V40     | 1,164  | 0,794  | Gp4   | V132    | 0,677  | 0,802  | Gp4   |
| V41     | 0,516  | -0,378 | Gp5   | V133    | 0,842  | 0,949  | Gp4   |
| V42     | 0,595  | 0,821  | Gp4   | V134    | -0,980 | -0,661 | Gp2   |
| V43     | 0,308  | -0,209 | Gp3   | V135    | 0,082  | -0,350 | Gp3   |

| Variety | Axis 1 | Axis 2 | Group | Variety | Axe 1  | Axe 2  | Group |
|---------|--------|--------|-------|---------|--------|--------|-------|
| V44     | -0,394 | -0,549 | Gp3   | V136    | 0,580  | -0,846 | Gp6   |
| V45     | -1,097 | -0,613 | Gp2   | V137    | 0,090  | -0,280 | Gp3   |
| V46     | 1,051  | -1,084 | Gp5   | V138    | 0,366  | -1,510 | Gp6   |
| V47     | 0,717  | -1,212 | Gp6   | V139    | 0,262  | -1,508 | Gp6   |
| V48     | 0,583  | 0,801  | Gp4   | V140    | -1,476 | -0,569 | Gp2   |
| V49     | 0,716  | 0,877  | Gp4   | V141    | 0,525  | -1,545 | Gp6   |
| V50     | 0,926  | 0,797  | Gp4   | V142    | 0,648  | -1,718 | Gp6   |
| V51     | 0,244  | -0,145 | Gp3   | V143    | 0,926  | -0,250 | Gp5   |
| V52     | 0,483  | -1,346 | Gp6   | V144    | 0,927  | -0,206 | Gp5   |
| V53     | 0,031  | 0,277  | Gp3   | V145    | 0,991  | -1,017 | Gp5   |
| V54     | -0,236 | -0,258 | Gp3   | V146    | 1,110  | -0,474 | Gp5   |
| V55     | -0,269 | -0,097 | Gp3   | V147    | 0,981  | -0,934 | Gp5   |
| V56     | 0,312  | -1,388 | Gp6   | V148    | 0,818  | 0,510  | Gp4   |
| V57     | 0,597  | -0,367 | Gp5   | V151    | 0,907  | 0,415  | Gp4   |
| V58     | -0,154 | -0,268 | Gp3   | V153    | -1,695 | -0,594 | Gp2   |
| V59     | -1,125 | -0,721 | Gp2   | V154    | -1,577 | -0,565 | Gp2   |
| V60     | 0,161  | -1,370 | Gp6   | V155    | -1,675 | -0,574 | Gp2   |
| V62     | 0,370  | -1,118 | Gp6   | V156    | -1,658 | -0,503 | Gp2   |
| V63     | -0,375 | -0,563 | Gp3   | V157    | -1,594 | -0,513 | Gp2   |
| V66     | 0,811  | -1,495 | Gp6   | V158    | -1,593 | -0,540 | Gp2   |
| V67     | 0,536  | -1,827 | Gp6   | V159    | -1,908 | -0,606 | Gp2   |
| V68     | 0,530  | -1,809 | Gp6   | V160    | -1,640 | -0,497 | Gp2   |
| V69     | -0,433 | 0,077  | Gp3   | V161    | -1,719 | -0,527 | Gp2   |
| V70     | 0,536  | 0,792  | Gp4   | V162    | -1,654 | -0,594 | Gp2   |
| V71     | -0,666 | 0,107  | Gp3   | V163    | -1,952 | -0,576 | Gp2   |
| V72     | -0,493 | 0,375  | Gp3   | V164    | -1,709 | -0,583 | Gp2   |
| V73     | 0,569  | -0,343 | Gp5   | V165    | 0,834  | 0,793  | Gp4   |
| V74     | 0,543  | -1,665 | Gp6   | V166    | 0,664  | 0,900  | Gp4   |
| V75     | 0,462  | 0,499  | Gp4   | V167    | 0,698  | 0,788  | Gp4   |
| V77     | 1,172  | 0,884  | Gp4   | V168    | 0,783  | 0,776  | Gp4   |
| V78     | 0,550  | 0,544  | Gp4   | V169    | 0,862  | 0,954  | Gp4   |
| V79     | 0,550  | -1,634 | Gp6   | V170    | 0,930  | 0,896  | Gp4   |
| V80     | -0,057 | 0,222  | Gp3   | V171    | 0,762  | 0,898  | Gp4   |
| V81     | 0,407  | 1,477  | Gp4   | V172    | 0,899  | 0,813  | Gp4   |
| V82     | 0,439  | 1,523  | Gp4   | V173    | 0,782  | 0,778  | Gp4   |
| V83     | 0,452  | 1,179  | Gp4   | V174    | 0,902  | 0,904  | Gp4   |
| V84     | 0,577  | 1,136  | Gp4   | V175    | 0,842  | 0,865  | Gp4   |
| V86     | 0,872  | 1,074  | Gp4   | V177    | 0,684  | 0,998  | Gp4   |
| V88     | 0,510  | 1,478  | Gp4   | V179    | 0,937  | 0,919  | Gp4   |

| Variety | Axis 1 | Axis 2 | Group | Variety | Axe 1 | Axe 2 | Group |
|---------|--------|--------|-------|---------|-------|-------|-------|
| V89     | 0,551  | 1,344  | Gp4   | V180    | 0,978 | 0,821 | Gp4   |
| V90     | 0,609  | 0,798  | Gp4   | V181    | 0,883 | 0,782 | Gp4   |
| V91     | -0,849 | -0,006 | Gp3   | V182    | 1,151 | 0,918 | Gp4   |
| V92     | -0,982 | -0,821 | Gp2   | V183    | 0,725 | 0,842 | Gp4   |
| V93     | -1,111 | -0,546 | Gp2   |         |       |       |       |

**Table S6.** The different varieties making up group 3 of the Factorial Analysis.

| Group 3                                 |                                     |
|-----------------------------------------|-------------------------------------|
| Guelmim                                 | V124 Olive Tree: <i>Meknasia</i>    |
|                                         | V125 Olive Tree: <i>Haouzia</i>     |
|                                         | V16 Barley: <i>Beldi</i>            |
|                                         | V24 Corn: <i>Byed</i>               |
|                                         | V30 Fava Bean: <i>Bayda</i>         |
|                                         | V44 Tomato                          |
|                                         | V51 Turnip: <i>Romi</i>             |
|                                         | V54 Zucchini                        |
| Alnif-Zagora-Aoufouss-Rich-Guelmim-Tata | V55 Gourd: <i>Mkerkba</i>           |
|                                         | V58 Eggplant                        |
|                                         | V63 Cabbage                         |
|                                         | V69 Parsley                         |
|                                         | V72 Alfalfa: <i>Beldia</i>          |
|                                         | V80 Fig tree: <i>Byed</i>           |
|                                         | V105 Apricot: <i>Beldi</i>          |
|                                         | V115 Almond: <i>Lhlou</i>           |
| Alnif-Rich                              | V10 Durum wheat: <i>Zerban</i>      |
| Guelmim-Tata                            | V43 Carrot: <i>Sfer</i>             |
|                                         | V25 Corn: <i>Hmer</i>               |
|                                         | V32 Fava Bean: <i>Kehla</i>         |
|                                         | V34 Pea: <i>Beldia</i>              |
| Alnif-Aoufouss-Rich-Guelmim-Tata        | V53 Chili pepper                    |
|                                         | V116 Apple tree: <i>Beldi</i>       |
|                                         | V122 Olive Tree: <i>Beldi</i>       |
|                                         | V126 Quince tree                    |
| Alnif-Zagora-Aoufouss-Guelmim-Tata      | V135 Date palm: <i>Bouffeggouss</i> |
|                                         | V137 Date palm: <i>Khelt</i>        |
| Alnif-Rich-Guelmim-Tata                 | V39 Potato: <i>Hamra</i>            |
| Aoufouss-Rich-Guelmim-Tata              | V71 Mint                            |
| Alnif-Zagora-Aoufouss-Rich              | V91 Fig tree: <i>Hmer</i>           |

**Table S7.** The different varieties making up group 1 of the Factorial Analysis.

| Group 1 |
|---------|
|---------|

|      |      |                             |
|------|------|-----------------------------|
| Rich | V2   | Durum wheat: <i>Aghzzaf</i> |
|      | V117 | Apple tree: <i>Romi</i>     |
|      | V118 | Apple tree: <i>Stark</i>    |
|      | V119 | Apple tree: <i>Golden</i>   |
|      | V120 | Apple tree: <i>Mchrat</i>   |
|      | V121 | Apple tree: <i>Lgala</i>    |
|      | V127 | Peach tree                  |
|      | V128 | Walnut                      |
|      | V129 | Prickly pear                |

**Table S8.** The different varieties making up group 2 of the Factorial Analysis.

| Group 2                    |      |                                  |
|----------------------------|------|----------------------------------|
| Aoufouss                   | V97  | Pomegranate tree: <i>Alânsri</i> |
|                            | V98  | Pomegranate tree: <i>Khrifi</i>  |
|                            | V153 | Date palm: <i>Akadousse</i>      |
|                            | V154 | Date palm: <i>Bid Djan</i>       |
|                            | V155 | Date palm: <i>Ras Latmer</i>     |
|                            | V156 | Date palm: <i>Initfite</i>       |
|                            | V157 | Date palm: <i>Bousserdoune</i>   |
|                            | V158 | Date palm: <i>Maäjoune</i>       |
|                            | V159 | Date palm: <i>Kerna</i>          |
|                            | V160 | Date palm: <i>Kerchaou</i>       |
|                            | V161 | Date palm: <i>Admou</i>          |
|                            | V162 | Date palm: <i>Bellahzid</i>      |
|                            | V163 | Date palm: <i>Ouhefssa</i>       |
|                            | V164 | Date palm: <i>Ouâamrane</i>      |
| Alnif-Aoufouss             | V7   | Durum wheat: <i>Korite</i>       |
|                            | V140 | Date palm: <i>Bouslikhen</i>     |
|                            | V59  | Lettuce                          |
| Zagora-Aoufouss            | V45  | Okra: <i>Hamra</i>               |
| Alnif-Aoufouss-Rich        | V93  | Fig tree: <i>Ain Lhajla</i>      |
| Alnif-Zagora-Aoufouss-Tata | V134 | Date palm: <i>Mejhoul</i>        |
| Alnif-Zagora-Aoufouss      | V110 | Grapevine: <i>Non précis</i>     |
|                            | V92  | Fig tree: <i>Khder</i>           |

**Table S9.** The different varieties making up group 4 of the Factorial Analysis.

| Group 4 |      |                                |
|---------|------|--------------------------------|
| Tata    | V11  | Durum wheat: <i>Tafilalet</i>  |
|         | V12  | Durum wheat: <i>Tizekrte</i>   |
|         | V15  | Soft wheat: <i>Tagourarte</i>  |
|         | V18  | Barley: <i>Azemez</i>          |
|         | V19  | Barley: <i>Bour</i>            |
|         | V20  | Barley: <i>Amazigh</i>         |
|         | V21  | Barley: <i>Lalten</i>          |
|         | V29  | Millet                         |
|         | V31  | Fava Bean: <i>Ouarzazate</i>   |
|         | V40  | Onion: <i>Romi</i>             |
|         | V50  | Turnip: <i>Mahfour</i>         |
|         | V77  | Alfalfa: <i>Moapa</i>          |
|         | V86  | Fig tree: <i>Tafounaste</i>    |
|         | V104 | Apricot: <i>Roumi</i>          |
|         | V108 | Grapevine: <i>Bzoul Lâawda</i> |
|         | V109 | Grapevine: <i>Mouska</i>       |
|         | V172 | Date palm: <i>Bouswayer</i>    |
|         | V173 | Date palm: <i>Najda</i>        |
|         | V174 | Date palm: <i>Tabouâtrite</i>  |
|         | V175 | Date palm: <i>Amennan</i>      |
|         | V176 | Date palm: <i>Tiskerte</i>     |
|         | V177 | Date palm: <i>Boulkissane</i>  |
|         | V178 | Date palm: <i>M-teglay</i>     |
|         | V179 | Date palm: <i>Saoudi</i>       |
|         | V180 | Date palm: <i>Boudi</i>        |
|         | V181 | Date palm: <i>Tighlo</i>       |
|         | V182 | Date palm: <i>Bimon</i>        |
|         | V183 | Date palm: <i>Boutwala</i>     |
| Guelmim | V22  | Barley: <i>Mderma</i>          |
|         | V23  | Barley: <i>Non précis</i>      |
|         | V81  | Fig tree: <i>Abachile</i>      |
|         | V82  | Fig tree: <i>Tamelka</i>       |
|         | V85  | Fig tree: <i>Tagordante</i>    |
|         | V86  | Fig tree: <i>Tagourdante</i>   |
|         | V87  | Fig tree: <i>Iâissa</i>        |

|              |      |                                  |
|--------------|------|----------------------------------|
| Guelmim-Tata | V88  | Fig tree: <i>Espagnol</i>        |
|              | V100 | Pomegranate tree: <i>Roudani</i> |
|              | V101 | Pomegranate tree: <i>Elâadmi</i> |
|              | V103 | Apricot: <i>LouzMechmach</i>     |
|              | V123 | Olive Tree: <i>Dahbia</i>        |
|              | V166 | Date palm: <i>Ist-Taghjijte</i>  |
|              | V13  | Durum wheat: <i>Ouchen</i>       |
|              | V14  | Soft wheat: <i>Azouga</i>        |
|              | V17  | Barley: <i>algouz</i>            |
|              | V42  | Carrot: <i>Sfer</i>              |
|              | V48  | Turnip: <i>Elfejli</i>           |
|              | V49  | Turnip: <i>Tagherdayte</i>       |
|              | V70  | Coriander                        |
|              | V75  | Alfalfa: <i>Canada</i>           |
|              | V83  | Fig tree: <i>Bakour</i>          |
|              | V84  | Fig tree: <i>Laghdania</i>       |
| Zagora-Tata  | V89  | Fig tree: <i>Bzzolte Lâawda</i>  |
|              | V90  | Fig tree: <i>Kehla</i>           |
|              | V102 | Pomegranate tree: <i>Sefri</i>   |
|              | V106 | Grapevine: <i>Bayda</i>          |
|              | V107 | Grapevine: <i>Kehla</i>          |
|              | V111 | Orange tree: <i>Zenbouh</i>      |
|              | V112 | Orange tree: <i>Navel</i>        |
|              | V113 | Mandarin tree                    |
|              | V114 | Almond: <i>Elhar</i>             |
|              | V130 | Carob tree                       |
|              | V131 | Pear tree                        |
|              | V132 | Lemon tree: <i>Beldi</i>         |
|              | V133 | Lemon tree: <i>Roumi</i>         |
|              | V165 | Date palm: <i>Bouwtoub</i>       |
|              | V167 | Date palm: <i>Tamoucha</i>       |
|              | V168 | Date palm: <i>Admam</i>          |
|              | V169 | Date palm: <i>Boutefah</i>       |
|              | V170 | Date palm: <i>Taghanimte</i>     |
|              | V171 | Date palm: <i>Tahdadte</i>       |
|              | V151 | Date palm: <i>M'ket</i>          |

|                                |      |                                  |
|--------------------------------|------|----------------------------------|
| Alnif-Guelmim-Tata             | V78  | Alfalfa: <i>Amércaine</i>        |
| Zagora-Guelmim-Tata            | V148 | Date palm: <i>Bousakri</i>       |
| Aoufouss-Guelmim-Tata          | V99  | Pomegranate tree: <i>Alhamed</i> |
| Rich-Guelmim-Tata              | V37  | Bean                             |
| Alnif-Aoufouss-Guelmim-Tata    | V28  | Sorghum                          |
| Alnif-Zagora-Rich-Guelmim-Tata | V96  | Pomegranate tree: <i>Beldi</i>   |

**Table S10.** The different varieties making up group 5 of the Factorial Analysis.

| Group 5                                 |      |                               |
|-----------------------------------------|------|-------------------------------|
| Zagora                                  | V46  | Okra: <i>Mchewka</i>          |
|                                         | V145 | Date palm: <i>Aglid</i>       |
|                                         | V147 | Date palm: <i>Aherdane</i>    |
| Zagora-Tata                             | V144 | Date palm: <i>Klane</i>       |
|                                         | V146 | Date palm: <i>Bourar</i>      |
| Alnif-Tata                              | V36  | Chickpea                      |
| Alnif-Zagora-Tata                       | V1   | Soft wheat: <i>Non précis</i> |
|                                         | V4   | Soft wheat: <i>Achtar</i>     |
|                                         | V33  | Lens                          |
| Zagora-Guelmim-Tata                     | V143 | Date palm: <i>Jihl</i>        |
| Alnif-Zagora-Guelmim-Tata               | V57  | Beet                          |
| Alnif-Zagora-Aoufouss-Rich-Guelmim-Tata | V41  | Onion: <i>Beldi</i>           |
|                                         | V73  | Alfalfa: <i>Australia</i>     |

**Table S11.** The different varieties making up group 6 of the Factorial Analysis.

| Group 6      |      |                               |
|--------------|------|-------------------------------|
| Alnif        | V3   | Durum wheat: <i>Aberyoune</i> |
|              | V5   | Durum wheat: <i>Aksad</i>     |
|              | V8   | Durum wheat: <i>Merzouka</i>  |
|              | V27  | Corn: <i>Rich</i>             |
|              | V35  | Pea: <i>Romia</i>             |
|              | V66  | Sesame                        |
|              | V67  | Watermelon                    |
|              | V68  | Melon                         |
|              | V74  | Alfalfa: <i>Saoudia</i>       |
|              | V79  | Forage sorghum                |
|              | V94  | Fig Tree: <i>Foukaâ</i>       |
|              | V95  | Fig Tree: <i>Targuiyte</i>    |
|              | V138 | Date palm: <i>Azizaw</i>      |
|              | V139 | Date palm: <i>Toungalte</i>   |
|              | V142 | Date palm: <i>Lferch</i>      |
| Alnif-Zagora | V141 | Date palm: <i>Tazggaghte</i>  |
|              | V62  | Garlic                        |

|                              |      |                            |
|------------------------------|------|----------------------------|
|                              | V9   | Soft wheat: <i>Nesma</i>   |
| Alnif, Zagora, Aoufouss      | V47  | Okra: <i>Retba</i>         |
|                              | V56  | Gourd: <i>Slawi</i>        |
| Alnif-Zagora-Rich            | V38  | Potato: <i>Bayda</i>       |
|                              | V52  | Bell pepper                |
| Alnif-Tata                   | V6   | Durum wheat: <i>Karim</i>  |
| Alnif-Aoufouss               | V60  | Cucumber                   |
| Alnif, Zagora, Aoufouss-Tata | V136 | Date palm: <i>Tahmoute</i> |

**Supplementary S1.** Survey conducted with farmers.

1- Sheet n° : .....

2-Date : .....

3-Commune : .....

4-Ksar (village) : .....

## A. SOCIO-DEMOGRAPHIC DATA

### • Main activity:

1- Fellah (farmer)

2- Other

### • Age :

### • Marital status:

1- Married

2- Single

3- Divorced

4-

Widower

### • No. of children:

### • Married and living with you:

### • No. of family members:

## B. EDUCATION

### • Level of education:

1- Illiterate

2- Masjid

3- Primary school

4- High school

5-

Other:

### • No. of children attending school:

1- Boys:

2- Girls:

### • Otherwise, what do they do for a living?

1- Family farming

2- employee

3- Other:

## C. PROPERTY CHARACTERISTICS

### • Total area:

### • No. of plots:

### • Area per plot:



• **Property type:**

**D. FARM EQUIPMENT**

**Transportation:** -Animal -Plow - Tractor - Truck  
**Ploughing and sowing:** - Traditional - Mechanical  
**Harvesting and threshing:** - Traditional - Mechanical  
**Irrigation:** - Traditional -Other:  
**Other equipments:**

• **Cereals**

| Species and varieties | Origin | Area size (ha) | Yield (kg) | Tendency | Price Dh/Kg |       | Storage type | Uses |
|-----------------------|--------|----------------|------------|----------|-------------|-------|--------------|------|
|                       |        |                |            |          | Purchase    | Sales |              |      |
|                       |        |                |            |          |             |       |              |      |
|                       |        |                |            |          |             |       |              |      |
|                       |        |                |            |          |             |       |              |      |
|                       |        |                |            |          |             |       |              |      |

• **Pulses**

| Species and varieties | Origin | Area size (ha) | Yield (kg) | Tendency | Price Dh/Kg |       | Storage type | Uses |
|-----------------------|--------|----------------|------------|----------|-------------|-------|--------------|------|
|                       |        |                |            |          | Purchase    | Sales |              |      |
|                       |        |                |            |          |             |       |              |      |
|                       |        |                |            |          |             |       |              |      |
|                       |        |                |            |          |             |       |              |      |

• **Fruit trees**

| Species varieties | Origin | No. of tree | Uses |       | Multiplying mode | Transformations |
|-------------------|--------|-------------|------|-------|------------------|-----------------|
|                   |        |             | Feed | Other |                  |                 |
|                   |        |             |      |       |                  |                 |
|                   |        |             |      |       |                  |                 |
|                   |        |             |      |       |                  |                 |
|                   |        |             |      |       |                  |                 |
|                   |        |             |      |       |                  |                 |

• **Date palm**

| Variety | Color | Consistency | Form | Bayoud sensitivity | Selling price | Uses | Transformation |
|---------|-------|-------------|------|--------------------|---------------|------|----------------|
|         |       |             |      |                    |               |      |                |
|         |       |             |      |                    |               |      |                |
|         |       |             |      |                    |               |      |                |
|         |       |             |      |                    |               |      |                |

---

**• Vegetables:**

| Species | Variety | Seed origin | Area size<br>(ha) | Production | Yield | Uses |
|---------|---------|-------------|-------------------|------------|-------|------|
|         |         |             |                   |            |       |      |
|         |         |             |                   |            |       |      |
|         |         |             |                   |            |       |      |

---

**• Forage crops:**

| Species | Variety | Seed origin | Area size<br>(ha) | Production | Yield | Uses |
|---------|---------|-------------|-------------------|------------|-------|------|
|         |         |             |                   |            |       |      |
|         |         |             |                   |            |       |      |
|         |         |             |                   |            |       |      |
|         |         |             |                   |            |       |      |

---

**• Livestock**

| Species | Race | Number of<br>livestock | feeding | Products | Destination |
|---------|------|------------------------|---------|----------|-------------|
| Cattle  |      |                        |         |          |             |
| Sheep   |      |                        |         |          |             |
| Goats   |      |                        |         |          |             |
| Other   |      |                        |         |          |             |

---

✓ **Planted and exploited species:**

✓ **Remarks:**
